# Supplementary material for: Polyethylenimine-functionalized cellulose aerogel beads for efficient dynamic removal of chromium(vi) from aqueous solution
Source: Royal Society of Chemistry journal article supplement (doi:10.1039/c7ra09940a), 2017-01-01
Supplement: c7ra09940a1.pdf [file c7ra09940a1.pdf]

***Electronic Supporting Information (ESI) for***

Polyethylenimine-Functionalized cellulose aerogel beads for  
efficient dynamic removal of chromium (VI) from aqueous solution

Dong-Mei Guo <sup>a</sup>, Qing-Da An <sup>a,\*</sup>, Zuo-Yi Xiao <sup>a</sup>, Shang-Ru Zhai <sup>a,\*</sup>, Zhan Shi<sup>b</sup>

<sup>a</sup> *Faculty of Light Industry and Chemical Engineering, Dalian Polytechnic University,  
Dalian 116034*

<sup>b</sup> *State Key Laboratory of Inorganic Synthesis and Preparative Chemistry, College of  
Chemistry, Jilin University, Changchun 130012, China*

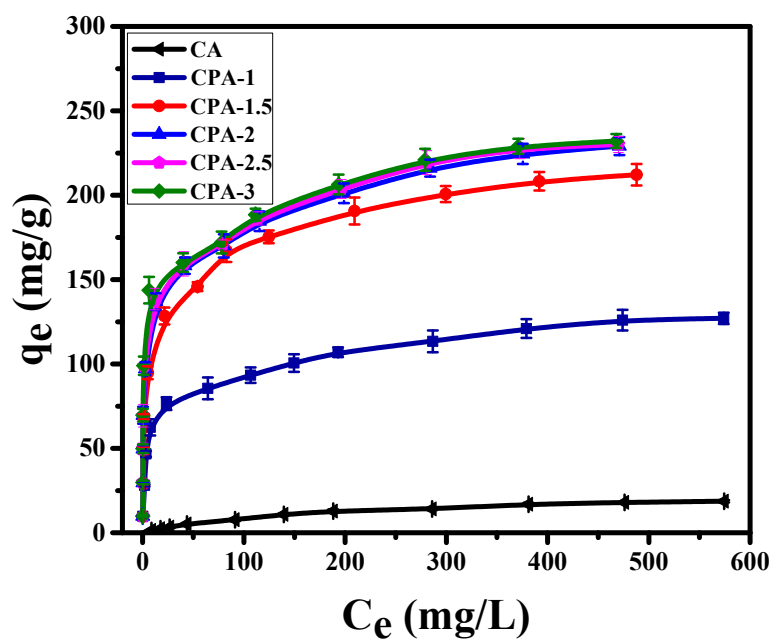

**Fig. S1.** Adsorption isotherms of Cr(VI) onto the CA, CPA-1, CPA-1.5, CPA-2, CPA-2.5 and CPA-3.

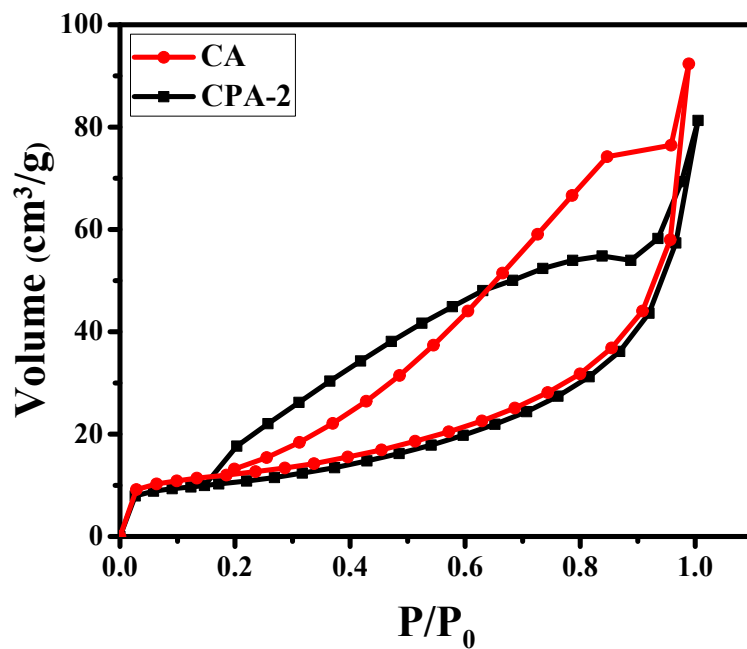

**Fig. S2.** Nitrogen adsorption–desorption isotherms of CA and CPA-2.

**Table S1** Textural parameters of CA and CPA-2.

| Samples | Specific surface area (m <sup>2</sup> /g) | Volume of pores (cm <sup>3</sup> /g) | Average pore size (nm) |
|---------|-------------------------------------------|--------------------------------------|------------------------|
| CA      | 41.7                                      | 0.14                                 | 13.7                   |
| CPA-2   | 36.8                                      | 0.12                                 | 13.5                   |
